# Supplementary material for: The landscape of RNA 3D structure modeling with transformer networks
Source: PubMed Central journal article supplement — Biol Methods Protoc. 2024 Jul 2;9(1):bpae047. doi: 10.1093/biomethods/bpae047 (PMC11244692; doi:10.1093/biomethods/bpae047), 2024-07-02
Supplement: bpae047_supplementary_data.pdf [file bpae047_supplementary_data.pdf]

# Supporting Information for

## The landscape of RNA 3D structure modeling with transformer networks

Sumit Tarafder<sup>1</sup>, Rahmatullah Roche<sup>1</sup>, Debswapna Bhattacharya<sup>1,\*</sup>

<sup>1</sup> Department of Computer Science, Virginia Tech, Blacksburg, VA 24061, United States of America.

\* [dbhattacharya@vt.edu](mailto:dbhattacharya@vt.edu)

### Supplementary Text:

#### Evaluation metrics and performance assessment

The predicted structural models were evaluated against the experimental coordinates provided by the CASP organizers for targets cleared for public access as of December 20, 2022 from [https://predictioncenter.org/download\\_area/CASP15/targets/](https://predictioncenter.org/download_area/CASP15/targets/) for the of the 12 CASP targets or obtained from PDB for the remaining 60 targets. Below, we provide a brief description of the evaluation metrics and performance assessment.

**TM-score.** Template modeling score (TM-score) (1) is a superposition-based evaluation metric to calculate the topological or global fold similarity between two structures. The score is calculated using the following equation:

$$TM - score = \max \left[ \frac{1}{L_N} \sum_{i=1}^{L_T} \frac{1}{1 + \left(\frac{d_i}{d_0}\right)^2} \right] \dots \dots \dots [1]$$

where  $L_N$  is the length of the reference RNA monomer,  $L_T$  is the length of the aligned region after superposition,  $d_i$  is the distance between the  $i^{\text{th}}$  pair of aligned nucleotides, and  $d_0$  is a length dependent scale to make the TM-score length independent. We have used US-align tool (1) to compute TM-score for RNA structure comparison. TM-score values range between 0 and 1, where 1 defines a perfect global topological similarity and a score  $> 0.5$  indicates similar fold between reference and prediction.

**IDDT.** The local distance difference test (IDDT) (2) provides a superposition-free method to determine structural similarity of the predicted model with respect to reference structure. IDDT compares the predicted coordinates to the reference coordinates by choosing a set of nearby atom distances in a default radius of 15Å and reports the accuracy of the model as a fraction of the preserved distances. We used the docker version of OpenStructure (3) from the OST registry: <https://git.scicore.unibas.ch/schwede/openstructure/-/tree/master/docker>. During evaluation, we used the option '--lddt-no-stereochecks' which does not remove nucleo-base or backbone atoms from nucleotides during calculation even if there is a presence of problematic stereochemistry (3) in the predicted model. IDDT also ranges between 0 and 1, with a higher score indicating better structural similarity.

**INF.** The interaction network fidelity (INF) (4), an environment-dependent local quality metric, was calculated using the official CASP15 assessment pipeline (5) available at <https://github.com/DasLab/casp-rna>. We used the "INF-all" variant of INF score that considers all types of base-pairing interaction patterns present in RNA molecules including stacking, canonical or Watson-Crick and non-Watson-Crick. INF score is computed from two interaction annotation sets  $S_R$  and  $S_P$  obtained from experimental and prediction models respectively as Matthews Correlation Coefficient using the following equation:

$$INF = \sqrt{\left(\frac{TP}{TP + FP}\right) \times \left(\frac{TP}{TP + FN}\right)} \dots \dots \dots [2]$$

where, TP = intersection of pairings from both sets, FP = Interactions that are only present in  $S_P$  and FN = Interactions that are only present in  $S_R$ . INF score ranges from (0,1) with a higher score indicating better base pairing orientation in the predictions.

**Clash score.** Clash score captures the steric violations of a structure and is defined as the number of “serious clashes” per thousand atoms including the hydrogen (H) atoms, where serious clash is identified as an overlap of non-H-bonds  $\geq 0.4 \text{ \AA}$  (6). We computed clash-score from MolProbity (7) package for quantifying the steric clashes.

**Supplementary Figures:**

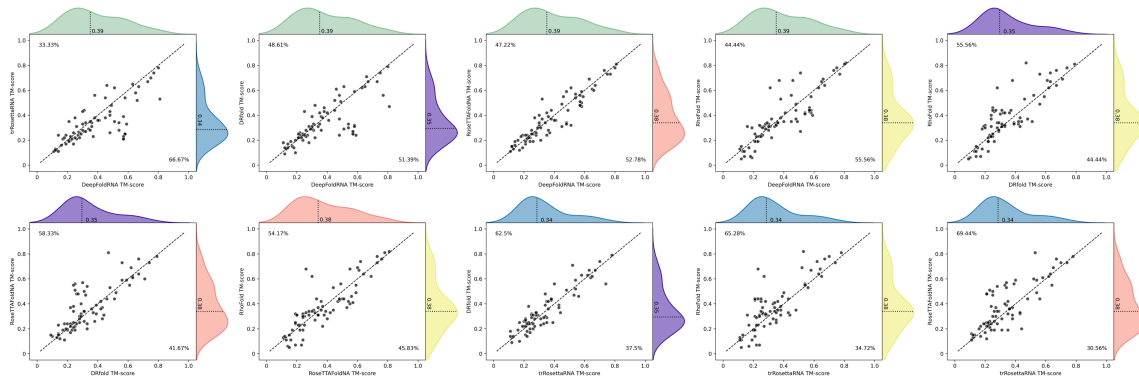

**Figure S1:** Head-to-head comparisons between all possible pairs of methods in terms of TM-score.

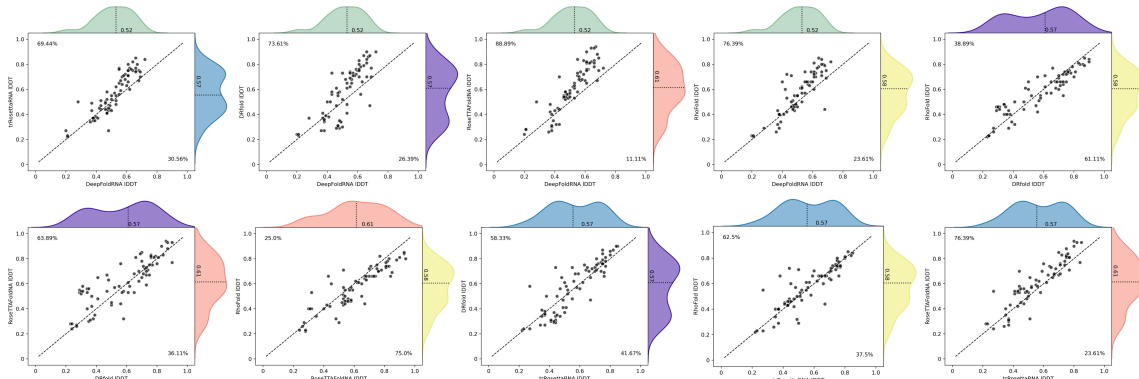

**Figure S2:** Head-to-head comparisons between all possible pairs of methods in terms of IDDT.

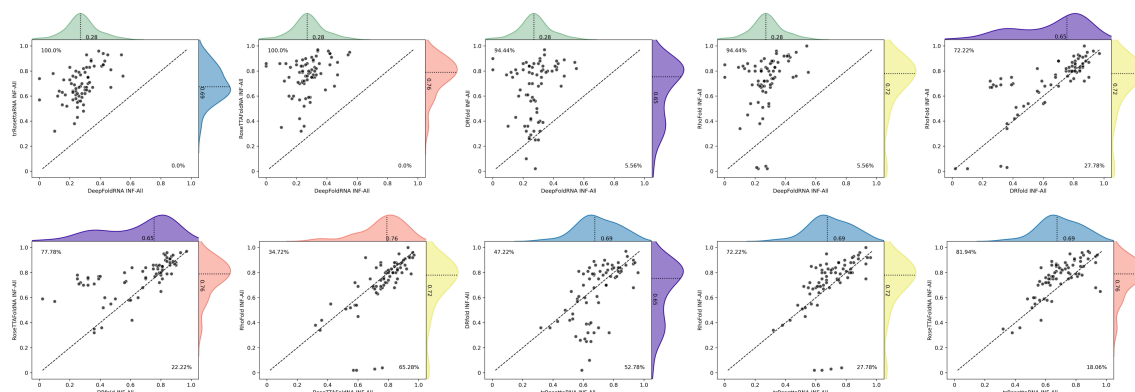

**Figure S3:** Head-to-head comparisons between all possible pairs of methods in terms of INF-All

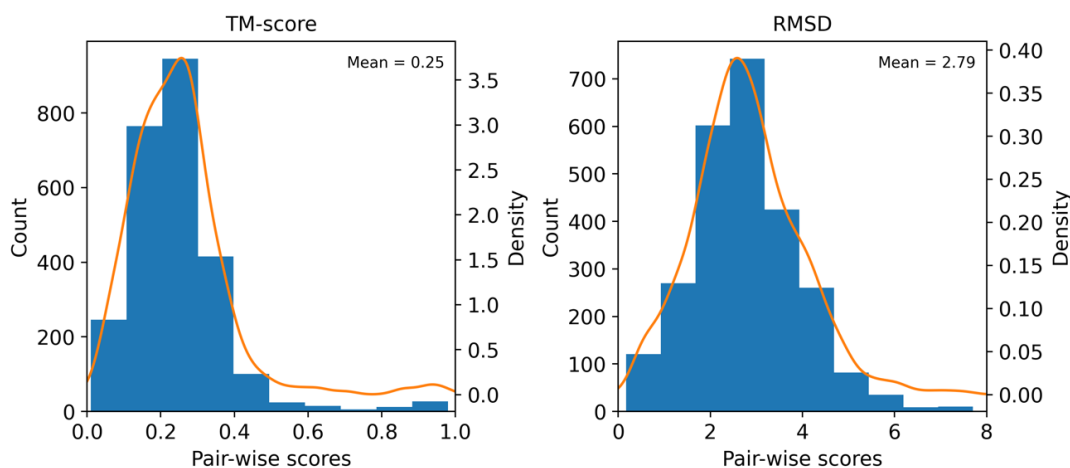

**Figure S4:** Unique pairwise similarity scores of the 72 structures in our benchmark set with mean values annotated on the top right showing the diversity of the evaluated experimental structures. A mean TM-score of 0.25 shows lack of fold similarity within the sequences in the set. The RMSD distribution on the other hand shows a varying range of values between 1 - 6 angstrom confirming structure dissimilarity among the experimental structures.

**Supplementary Tables:**

**Table S1:** Number of trainable parameters in each of the transformer-based models.

| Method        | Number of parameters(million/M) |
|---------------|---------------------------------|
| DeepFoldRNA   | 7.44 M                          |
| trRosettaRNA  | 17.85 M                         |
| RoseTTAFoldNA | 67.9 M                          |
| DRfold        | 13.12 M                         |
| RhoFold       | 27.39 M                         |

**Table S2:** Average prediction accuracies for five deep learning-based and one deep learning-free prediction method RNAcomposer on the benchmark set on a common set of targets (70) excluding R1138 and 7QDU\_Q (due to the limitation of <500 nucleotides for RNAcomposer). Bold denotes the best score.

| Method/Score  | TM-score    | IDDT        | INF-All     | Clash-score  |
|---------------|-------------|-------------|-------------|--------------|
| DeepFoldRNA   | <b>0.39</b> | 0.52        | 0.28        | 167.67       |
| trRosettaRNA  | 0.35        | 0.57        | 0.7         | 27.25        |
| DRfold        | 0.35        | 0.58        | 0.66        | 177.56       |
| RoseTTAFoldNA | 0.38        | <b>0.62</b> | <b>0.77</b> | 45.75        |
| RhoFold       | <b>0.39</b> | 0.58        | 0.74        | 509.89       |
| RNAcomposer   | 0.22        | 0.49        | 0.61        | <b>22.66</b> |

**Table S3:** Detailed scores for DeepFoldRNA predictions.

| Targets | TM-score | IDDT | INF  | Clash-score |
|---------|----------|------|------|-------------|
| 6YMC_A  | 0.48     | 0.67 | 0.34 | 158.65      |
| 7ECM_A  | 0.27     | 0.69 | 0.55 | 145.08      |
| 7EDL_A  | 0.36     | 0.68 | 0.34 | 192.36      |
| 7EDM_A  | 0.34     | 0.66 | 0.43 | 221.91      |
| 7EEM_A  | 0.45     | 0.61 | 0.42 | 144.23      |
| 7EFG_A  | 0.31     | 0.55 | 0.39 | 147.97      |
| 7EQJ_A  | 0.73     | 0.64 | 0.26 | 175.77      |
| 7EXY_A  | 0.24     | 0.48 | 0    | 138.61      |
| 7KUB_A  | 0.35     | 0.5  | 0.22 | 180.81      |
| 7KUC_A  | 0.49     | 0.62 | 0.31 | 159.92      |
| 7KUD_A  | 0.25     | 0.43 | 0    | 182.27      |
| 7KVT_B  | 0.37     | 0.4  | 0.26 | 181.44      |
| 7MLW_F  | 0.81     | 0.62 | 0.3  | 185.82      |
| 7Q48_A  | 0.13     | 0.21 | 0.25 | 148.25      |
| 7Q6L_A  | 0.14     | 0.2  | 0.1  | 133.9       |
| 7Q7X_B  | 0.26     | 0.69 | 0.54 | 172.28      |
| 7Q7X_C  | 0.24     | 0.42 | 0.32 | 123.06      |
| 7QA2_A  | 0.11     | 0.21 | 0.23 | 250         |
| 7QDU_Q  | 0.19     | 0.38 | 0.22 | 152.34      |
| 7QP2_A  | 0.46     | 0.66 | 0.42 | 144.93      |
| 7R6L_A  | 0.57     | 0.47 | 0.28 | 164.27      |
| 7R6L_B  | 0.17     | 0.43 | 0.17 | 164.61      |

|        |      |      |      |        |
|--------|------|------|------|--------|
| 7R6M_A | 0.59 | 0.48 | 0.3  | 165.4  |
| 7RQ5_A | 0.51 | 0.68 | 0.47 | 240.26 |
| 7RWR_A | 0.38 | 0.47 | 0.29 | 139.44 |
| 7SHX_A | 0.22 | 0.47 | 0.26 | 169.01 |
| 7UCR_A | 0.51 | 0.64 | 0.41 | 140.53 |
| 7UGA_A | 0.41 | 0.57 | 0.36 | 130.81 |
| 7UMC_A | 0.32 | 0.56 | 0.27 | 132.82 |
| 7UMD_A | 0.26 | 0.55 | 0.16 | 158.06 |
| 7UME_A | 0.3  | 0.59 | 0.42 | 204.26 |
| 7UQ6_B | 0.63 | 0.59 | 0.32 | 161.23 |
| 7UVT_A | 0.58 | 0.49 | 0.31 | 197.29 |
| 7UZ0_A | 0.77 | 0.63 | 0.24 | 155.95 |
| 7V06_A | 0.45 | 0.6  | 0.2  | 158.87 |
| 7V9E_A | 0.31 | 0.46 | 0.15 | 186.5  |
| 7VFT_A | 0.21 | 0.66 | 0.45 | 114.56 |
| 7WIA_V | 0.4  | 0.58 | 0.24 | 144.42 |
| 7XD3_N | 0.57 | 0.47 | 0.25 | 180.91 |
| 7XJZ_B | 0.75 | 0.61 | 0.09 | 189.89 |
| 7XK0_B | 0.8  | 0.61 | 0.13 | 183.01 |
| 7XSN_N | 0.58 | 0.49 | 0.33 | 184.93 |
| 7YC8_N | 0.54 | 0.46 | 0.31 | 176.91 |
| 7YGC_N | 0.54 | 0.48 | 0.3  | 184.46 |
| 8BGU_3 | 0.67 | 0.61 | 0.2  | 176.79 |
| 8D2A_A | 0.3  | 0.55 | 0.33 | 193.4  |
| 8DMB_W | 0.16 | 0.37 | 0.22 | 158.69 |
| 8DP3_R | 0.3  | 0.52 | 0.33 | 185.15 |
| 8E0F_D | 0.35 | 0.72 | 0.47 | 118.91 |
| 8EG0_C | 0.65 | 0.61 | 0.3  | 146.87 |
| 8F4O_B | 0.58 | 0.57 | 0.24 | 145.62 |
| 8FCS_A | 0.66 | 0.66 | 0.31 | 163.48 |
| 8GXC_A | 0.32 | 0.38 | 0.15 | 146.23 |
| 8HB8_A | 0.22 | 0.41 | 0.25 | 175.3  |
| 8HBA_A | 0.28 | 0.38 | 0.29 | 181.64 |
| 8HBA_B | 0.19 | 0.38 | 0.29 | 183.98 |
| 8HD6_N | 0.57 | 0.5  | 0.24 | 187.21 |
| 8I3Z_B | 0.12 | 0.39 | 0.22 | 200.4  |
| 8I43_A | 0.21 | 0.55 | 0.26 | 198.02 |
| 8I7N_N | 0.57 | 0.47 | 0.24 | 186.68 |
| R1107  | 0.48 | 0.53 | 0.23 | 162.62 |

|             |             |             |             |               |
|-------------|-------------|-------------|-------------|---------------|
| R1108       | 0.48        | 0.56        | 0.35        | 152.25        |
| R1116       | 0.38        | 0.53        | 0.24        | 184.94        |
| R1117       | 0.21        | 0.43        | 0.18        | 196.54        |
| R1126       | 0.18        | 0.37        | 0.21        | 154.74        |
| R1128       | 0.36        | 0.61        | 0.32        | 162.87        |
| R1136       | 0.14        | 0.28        | 0.27        | 131.86        |
| R1138       | 0.12        | 0.36        | 0.28        | 140.9         |
| R1149       | 0.28        | 0.53        | 0.12        | 164.71        |
| R1156       | 0.29        | 0.53        | 0.28        | 165.26        |
| R1189       | 0.23        | 0.46        | 0.27        | 148.38        |
| R1190       | 0.25        | 0.5         | 0.25        | 148.38        |
|             |             |             |             |               |
| <b>Mean</b> | <b>0.39</b> | <b>0.52</b> | <b>0.28</b> | <b>167.08</b> |

**Table S4:** Detailed scores for trRosettaRNA predictions.

| <b>Targets</b> | <b>TM-score</b> | <b>IDDT</b> | <b>INF</b> | <b>Clash-score</b> |
|----------------|-----------------|-------------|------------|--------------------|
| 6YMC_A         | 0.4             | 0.8         | 0.89       | 5.98               |
| 7ECM_A         | 0.24            | 0.7         | 0.76       | 2.57               |
| 7EDL_A         | 0.34            | 0.75        | 0.88       | 9.87               |
| 7EDM_A         | 0.29            | 0.75        | 0.88       | 2.82               |
| 7EEM_A         | 0.54            | 0.8         | 0.85       | 16.67              |
| 7EFG_A         | 0.44            | 0.77        | 0.96       | 17.57              |
| 7EQJ_A         | 0.67            | 0.75        | 0.79       | 28.23              |
| 7EXY_A         | 0.17            | 0.27        | 0.57       | 0                  |
| 7KUB_A         | 0.35            | 0.55        | 0.76       | 14.53              |
| 7KUC_A         | 0.48            | 0.77        | 0.93       | 1.91               |
| 7KUD_A         | 0.38            | 0.44        | 0.74       | 0                  |
| 7KVT_B         | 0.23            | 0.38        | 0.56       | 69.78              |
| 7MLW_F         | 0.53            | 0.6         | 0.67       | 35.17              |
| 7Q48_A         | 0.12            | 0.22        | 0.43       | 1.39               |
| 7Q6L_A         | 0.11            | 0.27        | 0.32       | 9.72               |
| 7Q7X_B         | 0.31            | 0.74        | 0.93       | 2.6                |
| 7Q7X_C         | 0.26            | 0.45        | 0.75       | 0                  |
| 7QA2_A         | 0.11            | 0.23        | 0.38       | 0                  |
| 7QDU_Q         | 0.17            | 0.37        | 0.64       | 42.67              |
| 7QP2_A         | 0.64            | 0.85        | 0.94       | 15.48              |
| 7R6L_A         | 0.39            | 0.44        | 0.62       | 43.53              |

|        |      |      |      |       |
|--------|------|------|------|-------|
| 7R6L_B | 0.21 | 0.47 | 0.61 | 0     |
| 7R6M_A | 0.33 | 0.43 | 0.65 | 31.77 |
| 7RQ5_A | 0.35 | 0.67 | 0.81 | 8.1   |
| 7RWR_A | 0.38 | 0.58 | 0.82 | 13.92 |
| 7SHX_A | 0.2  | 0.52 | 0.6  | 27.28 |
| 7UCR_A | 0.62 | 0.82 | 0.84 | 36.61 |
| 7UGA_A | 0.36 | 0.7  | 0.84 | 22.43 |
| 7UMC_A | 0.34 | 0.59 | 0.68 | 40.37 |
| 7UMD_A | 0.21 | 0.56 | 0.73 | 28.64 |
| 7UME_A | 0.43 | 0.68 | 0.85 | 14.38 |
| 7UQ6_B | 0.65 | 0.72 | 0.7  | 40.56 |
| 7UVT_A | 0.25 | 0.47 | 0.67 | 25.63 |
| 7UZ0_A | 0.74 | 0.76 | 0.75 | 58.76 |
| 7V06_A | 0.38 | 0.63 | 0.83 | 17.52 |
| 7V9E_A | 0.27 | 0.5  | 0.63 | 48.26 |
| 7VFT_A | 0.2  | 0.74 | 0.93 | 0     |
| 7WIA_V | 0.36 | 0.71 | 0.8  | 20.89 |
| 7XD3_N | 0.21 | 0.41 | 0.55 | 43.09 |
| 7XJZ_B | 0.7  | 0.75 | 0.78 | 39.05 |
| 7XK0_B | 0.78 | 0.75 | 0.64 | 41.91 |
| 7XSN_N | 0.25 | 0.44 | 0.64 | 40.59 |
| 7YC8_N | 0.28 | 0.44 | 0.65 | 31.75 |
| 7YGC_N | 0.34 | 0.45 | 0.62 | 33.73 |
| 8BGU_3 | 0.63 | 0.71 | 0.73 | 51.52 |
| 8D2A_A | 0.33 | 0.76 | 0.83 | 25.3  |
| 8DMB_W | 0.16 | 0.43 | 0.63 | 17.56 |
| 8DP3_R | 0.28 | 0.57 | 0.71 | 60.85 |
| 8E0F_D | 0.28 | 0.84 | 0.67 | 23.37 |
| 8EG0_C | 0.58 | 0.71 | 0.79 | 19.61 |
| 8F4O_B | 0.54 | 0.64 | 0.64 | 81.24 |
| 8FCS_A | 0.52 | 0.77 | 0.83 | 17.54 |
| 8GXC_A | 0.27 | 0.35 | 0.53 | 19.18 |
| 8HB8_A | 0.23 | 0.37 | 0.51 | 34.21 |
| 8HBA_A | 0.22 | 0.37 | 0.53 | 38.49 |
| 8HBA_B | 0.24 | 0.37 | 0.48 | 36.4  |
| 8HD6_N | 0.23 | 0.43 | 0.61 | 31.91 |
| 8I3Z_B | 0.13 | 0.35 | 0.57 | 5.96  |
| 8I43_A | 0.19 | 0.65 | 0.67 | 18.12 |

|             |             |             |             |              |
|-------------|-------------|-------------|-------------|--------------|
| 8I7N_N      | 0.21        | 0.41        | 0.58        | 45.56        |
| R1107       | 0.26        | 0.51        | 0.69        | 46.15        |
| R1108       | 0.43        | 0.67        | 0.67        | 68.29        |
| R1116       | 0.56        | 0.62        | 0.66        | 31.8         |
| R1117       | 0.35        | 0.51        | 0.52        | 15.12        |
| R1126       | 0.22        | 0.49        | 0.7         | 62.36        |
| R1128       | 0.31        | 0.66        | 0.75        | 82.37        |
| R1136       | 0.24        | 0.5         | 0.77        | 5.24         |
| R1138       | 0.12        | 0.34        | 0.59        | 21.32        |
| R1149       | 0.26        | 0.48        | 0.6         | 43.14        |
| R1156       | 0.25        | 0.55        | 0.7         | 19.4         |
| R1189       | 0.21        | 0.49        | 0.56        | 34.22        |
| R1190       | 0.22        | 0.52        | 0.62        | 29.78        |
|             |             |             |             |              |
| <b>Mean</b> | <b>0.34</b> | <b>0.57</b> | <b>0.69</b> | <b>27.39</b> |

**Table S5:** Detailed scores for DRfold predictions.

| <b>Targets</b> | <b>TM-score</b> | <b>IDDT</b> | <b>INF</b> | <b>Clash-score</b> |
|----------------|-----------------|-------------|------------|--------------------|
| 6YMC_A         | 0.56            | 0.86        | 0.93       | 19.12              |
| 7ECM_A         | 0.24            | 0.7         | 0.82       | 120.51             |
| 7EDL_A         | 0.39            | 0.87        | 0.97       | 11.25              |
| 7EDM_A         | 0.31            | 0.84        | 0.86       | 4.23               |
| 7EEM_A         | 0.52            | 0.83        | 0.83       | 93.94              |
| 7EFG_A         | 0.33            | 0.74        | 0.8        | 123.99             |
| 7EQJ_A         | 0.67            | 0.79        | 0.83       | 103.65             |
| 7EXY_A         | 0.25            | 0.58        | 0.81       | 63.24              |
| 7KUB_A         | 0.42            | 0.73        | 0.87       | 74.88              |
| 7KUC_A         | 0.51            | 0.78        | 0.9        | 47.71              |
| 7KUD_A         | 0.43            | 0.73        | 0.9        | 66.67              |
| 7KVT_B         | 0.38            | 0.5         | 0.59       | 251.26             |
| 7MLW_F         | 0.47            | 0.56        | 0.68       | 167.91             |
| 7Q48_A         | 0.13            | 0.23        | 0.41       | 115.76             |
| 7Q6L_A         | 0.14            | 0.24        | 0.36       | 41.61              |
| 7Q7X_B         | 0.23            | 0.77        | 0.87       | 48.3               |
| 7Q7X_C         | 0.2             | 0.5         | 0.7        | 65.81              |
| 7QA2_A         | 0.18            | 0.24        | 0.36       | 78.62              |
| 7QDU_Q         | 0.1             | 0.27        | 0.1        | 119.09             |



|        |      |      |      |        |
|--------|------|------|------|--------|
| 7QP2_A | 0.61 | 0.9  | 0.88 | 83.14  |
| 7R6L_A | 0.25 | 0.31 | 0.25 | 360.32 |
| 7R6L_B | 0.15 | 0.56 | 0.6  | 181.19 |
| 7R6M_A | 0.24 | 0.29 | 0.25 | 365.68 |
| 7RQ5_A | 0.29 | 0.47 | 0.76 | 53.48  |
| 7RWR_A | 0.43 | 0.57 | 0.77 | 213.58 |
| 7SHX_A | 0.26 | 0.55 | 0.7  | 197.34 |
| 7UCR_A | 0.63 | 0.87 | 0.84 | 96     |
| 7UGA_A | 0.36 | 0.73 | 0.8  | 128.75 |
| 7UMC_A | 0.48 | 0.68 | 0.86 | 89.98  |
| 7UMD_A | 0.28 | 0.62 | 0.78 | 128.12 |
| 7UME_A | 0.39 | 0.72 | 0.81 | 74.61  |
| 7UQ6_B | 0.62 | 0.76 | 0.75 | 152.54 |
| 7UVT_A | 0.32 | 0.34 | 0.32 | 389.35 |
| 7UZ0_A | 0.56 | 0.66 | 0.7  | 122.15 |
| 7V06_A | 0.44 | 0.75 | 0.81 | 81.62  |
| 7V9E_A | 0.28 | 0.61 | 0.81 | 178.07 |
| 7VFT_A | 0.22 | 0.7  | 0.68 | 79.73  |
| 7WIA_V | 0.42 | 0.71 | 0.84 | 72.15  |
| 7XD3_N | 0.26 | 0.3  | 0.29 | 347.05 |
| 7XJZ_B | 0.74 | 0.76 | 0.77 | 67.07  |
| 7XK0_B | 0.79 | 0.76 | 0.75 | 63.56  |
| 7XSN_N | 0.31 | 0.34 | 0.39 | 400.67 |
| 7YC8_N | 0.33 | 0.29 | 0.4  | 466.11 |
| 7YGC_N | 0.3  | 0.35 | 0.39 | 433.38 |
| 8BGU_3 | 0.67 | 0.8  | 0.86 | 90.3   |
| 8D2A_A | 0.29 | 0.69 | 0.84 | 102.25 |
| 8DMB_W | 0.19 | 0.37 | 0.32 | 415.37 |
| 8DP3_R | 0.31 | 0.68 | 0.81 | 172.06 |
| 8E0F_D | 0.33 | 0.9  | 0.89 | 17.51  |
| 8EG0_C | 0.63 | 0.75 | 0.86 | 91.61  |
| 8F4O_B | 0.59 | 0.71 | 0.84 | 87.35  |
| 8FCS_A | 0.71 | 0.81 | 0.88 | 76.82  |
| 8GXC_A | 0.22 | 0.34 | 0.43 | 306.88 |
| 8HB8_A | 0.24 | 0.38 | 0.42 | 292.22 |
| 8HBA_A | 0.18 | 0.35 | 0.47 | 285.43 |
| 8HBA_B | 0.2  | 0.36 | 0.5  | 280.43 |
| 8HD6_N | 0.25 | 0.3  | 0.27 | 363.67 |
| 8I3Z_B | 0.14 | 0.39 | 0.61 | 94.43  |

|             |             |             |             |               |
|-------------|-------------|-------------|-------------|---------------|
| 8I43_A      | 0.22        | 0.73        | 0.78        | 49.34         |
| 8I7N_N      | 0.27        | 0.31        | 0.26        | 323.8         |
| R1107       | 0.24        | 0.41        | 0.61        | 135.59        |
| R1108       | 0.37        | 0.65        | 0.79        | 165.08        |
| R1116       | 0.46        | 0.61        | 0.79        | 209.02        |
| R1117       | 0.25        | 0.58        | 0.65        | 195.02        |
| R1126       | 0.14        | 0.41        | 0.36        | 525.35        |
| R1128       | 0.28        | 0.7         | 0.8         | 249.9         |
| R1136       | 0.17        | 0.37        | 0.32        | 414.27        |
| R1138       | 0.09        | 0.27        | 0.02        | 66.67         |
| R1149       | 0.31        | 0.65        | 0.79        | 164.21        |
| R1156       | 0.29        | 0.48        | 0.56        | 286.65        |
| R1189       | 0.22        | 0.47        | 0.57        | 355.28        |
| R1190       | 0.24        | 0.52        | 0.56        | 355.28        |
|             |             |             |             |               |
| <b>Mean</b> | <b>0.35</b> | <b>0.57</b> | <b>0.65</b> | <b>175.21</b> |

**Table S6:** Detailed scores for RoseTTAFoldNA predictions.

| <b>Targets</b> | <b>TM-score</b> | <b>IDDT</b> | <b>INF</b> | <b>Clash-score</b> |
|----------------|-----------------|-------------|------------|--------------------|
| 6YMC_A         | 0.59            | 0.94        | 0.96       | 9.56               |
| 7ECM_A         | 0.38            | 0.85        | 0.95       | 0                  |
| 7EDL_A         | 0.39            | 0.88        | 0.97       | 7.03               |
| 7EDM_A         | 0.34            | 0.83        | 0.91       | 9.86               |
| 7EEM_A         | 0.49            | 0.9         | 0.94       | 8.32               |
| 7EFG_A         | 0.2             | 0.71        | 0.65       | 191.39             |
| 7EQJ_A         | 0.76            | 0.82        | 0.9        | 22.06              |
| 7EXY_A         | 0.22            | 0.54        | 0.84       | 31.5               |
| 7KUB_A         | 0.42            | 0.59        | 0.79       | 27.45              |
| 7KUC_A         | 0.44            | 0.81        | 0.88       | 113.03             |
| 7KUD_A         | 0.28            | 0.7         | 0.86       | 94.79              |
| 7KVT_B         | 0.26            | 0.43        | 0.58       | 64.77              |
| 7MLW_F         | 0.81            | 0.76        | 0.81       | 50.98              |
| 7Q48_A         | 0.13            | 0.28        | 0.36       | 69.93              |
| 7Q6L_A         | 0.16            | 0.24        | 0.35       | 24.9               |
| 7Q7X_B         | 0.19            | 0.75        | 0.93       | 15.56              |
| 7Q7X_C         | 0.19            | 0.45        | 0.75       | 6.43               |
| 7QA2_A         | 0.11            | 0.28        | 0.32       | 93.92              |
| 7QDU_Q         | 0.14            | 0.27        | 0.57       | 49.55              |

|        |      |      |      |        |
|--------|------|------|------|--------|
| 7QP2_A | 0.55 | 0.93 | 0.94 | 9.5    |
| 7R6L_A | 0.56 | 0.58 | 0.78 | 44.93  |
| 7R6L_B | 0.12 | 0.44 | 0.58 | 35.42  |
| 7R6M_A | 0.55 | 0.53 | 0.75 | 58.37  |
| 7RQ5_A | 0.32 | 0.67 | 0.77 | 66.13  |
| 7RWR_A | 0.37 | 0.53 | 0.79 | 58.24  |
| 7SHX_A | 0.24 | 0.58 | 0.76 | 66.34  |
| 7UCR_A | 0.62 | 0.93 | 0.96 | 8      |
| 7UGA_A | 0.36 | 0.67 | 0.78 | 70.71  |
| 7UMC_A | 0.53 | 0.7  | 0.86 | 59.14  |
| 7UMD_A | 0.25 | 0.58 | 0.83 | 32.56  |
| 7UME_A | 0.32 | 0.72 | 0.85 | 111.36 |
| 7UQ6_B | 0.69 | 0.83 | 0.83 | 44.26  |
| 7UVT_A | 0.47 | 0.56 | 0.75 | 44.98  |
| 7UZ0_A | 0.73 | 0.81 | 0.84 | 30.26  |
| 7V06_A | 0.31 | 0.67 | 0.85 | 48.83  |
| 7V9E_A | 0.3  | 0.53 | 0.75 | 71.76  |
| 7VFT_A | 0.17 | 0.78 | 0.68 | 25.37  |
| 7WIA_V | 0.36 | 0.68 | 0.79 | 52.5   |
| 7XD3_N | 0.48 | 0.52 | 0.7  | 50.29  |
| 7XJZ_B | 0.73 | 0.81 | 0.86 | 25.15  |
| 7XK0_B | 0.78 | 0.82 | 0.86 | 28.07  |
| 7XSN_N | 0.5  | 0.53 | 0.77 | 48.46  |
| 7YC8_N | 0.54 | 0.55 | 0.77 | 47.49  |
| 7YGC_N | 0.57 | 0.56 | 0.75 | 46.19  |
| 8BGU_3 | 0.64 | 0.76 | 0.88 | 36.79  |
| 8D2A_A | 0.4  | 0.84 | 0.92 | 46.9   |
| 8DMB_W | 0.2  | 0.42 | 0.7  | 47.94  |
| 8DP3_R | 0.34 | 0.62 | 0.82 | 41.84  |
| 8E0F_D | 0.24 | 0.77 | 0.87 | 9.72   |
| 8EG0_C | 0.61 | 0.75 | 0.91 | 31.46  |
| 8F4O_B | 0.59 | 0.74 | 0.89 | 29.86  |
| 8FCS_A | 0.6  | 0.81 | 0.89 | 31.11  |
| 8GXC_A | 0.37 | 0.4  | 0.6  | 29.53  |
| 8HB8_A | 0.21 | 0.32 | 0.52 | 66     |
| 8HBA_A | 0.24 | 0.3  | 0.55 | 34.57  |
| 8HBA_B | 0.24 | 0.31 | 0.59 | 43.69  |
| 8HD6_N | 0.51 | 0.54 | 0.72 | 68.33  |
| 8I3Z_B | 0.15 | 0.35 | 0.42 | 49.7   |

|             |             |             |             |              |
|-------------|-------------|-------------|-------------|--------------|
| 8I43_A      | 0.24        | 0.73        | 0.85        | 54.55        |
| 8I7N_N      | 0.48        | 0.54        | 0.71        | 61.28        |
| R1107       | 0.34        | 0.65        | 0.84        | 35.65        |
| R1108       | 0.33        | 0.68        | 0.86        | 40.2         |
| R1116       | 0.44        | 0.61        | 0.8         | 48.34        |
| R1117       | 0.19        | 0.32        | 0.6         | 59.2         |
| R1126       | 0.23        | 0.48        | 0.71        | 34.25        |
| R1128       | 0.28        | 0.65        | 0.8         | 42.87        |
| R1136       | 0.19        | 0.5         | 0.76        | 47.45        |
| R1138       | 0.15        | 0.26        | 0.59        | 51.67        |
| R1149       | 0.26        | 0.53        | 0.72        | 62.31        |
| R1156       | 0.3         | 0.63        | 0.8         | 41.77        |
| R1189       | 0.22        | 0.54        | 0.73        | 43.51        |
| R1190       | 0.25        | 0.57        | 0.72        | 37.55        |
|             |             |             |             |              |
| <b>Mean</b> | <b>0.38</b> | <b>0.61</b> | <b>0.76</b> | <b>45.88</b> |

**Table S7:** Detailed scores for RhoFold predictions.

| <b>Targets</b> | <b>TM-score</b> | <b>IDDT</b> | <b>INF</b> | <b>Clash-score</b> |
|----------------|-----------------|-------------|------------|--------------------|
| 6YMC_A         | 0.49            | 0.8         | 0.96       | 442                |
| 7ECM_A         | 0.31            | 0.69        | 0.79       | 466.84             |
| 7EDL_A         | 0.34            | 0.79        | 0.94       | 505.08             |
| 7EDM_A         | 0.31            | 0.8         | 0.91       | 431.46             |
| 7EEM_A         | 0.56            | 0.81        | 0.93       | 507.92             |
| 7EFG_A         | 0.31            | 0.74        | 0.92       | 479.81             |
| 7EQJ_A         | 0.76            | 0.78        | 0.9        | 435.57             |
| 7EXY_A         | 0.23            | 0.55        | 0.85       | 478.87             |
| 7KUB_A         | 0.33            | 0.55        | 0.72       | 565.03             |
| 7KUC_A         | 0.35            | 0.73        | 0.87       | 524.27             |
| 7KUD_A         | 0.31            | 0.72        | 0.75       | 447.37             |
| 7KVT_B         | 0.68            | 0.66        | 0.72       | 495.11             |
| 7MLW_F         | 0.82            | 0.7         | 0.77       | 454.69             |
| 7Q48_A         | 0.11            | 0.22        | 0.42       | 465.44             |
| 7Q6L_A         | 0.11            | 0.23        | 0.34       | 461.1              |
| 7Q7X_B         | 0.24            | 0.75        | 1          | 514.02             |
| 7Q7X_C         | 0.32            | 0.6         | 0.88       | 565.5              |
| 7QA2_A         | 0.13            | 0.23        | 0.38       | 506.28             |
| 7QDU_Q         | 0.06            | 0.29        | 0.02       | 65.59              |

|        |      |      |      |        |
|--------|------|------|------|--------|
| 7QP2_A | 0.68 | 0.84 | 0.92 | 519.46 |
| 7R6L_A | 0.46 | 0.46 | 0.72 | 777.45 |
| 7R6L_B | 0.14 | 0.42 | 0.54 | 562.41 |
| 7R6M_A | 0.4  | 0.43 | 0.67 | 730.32 |
| 7RQ5_A | 0.27 | 0.44 | 0.76 | 503.28 |
| 7RWR_A | 0.38 | 0.51 | 0.8  | 467.84 |
| 7SHX_A | 0.19 | 0.47 | 0.68 | 477.43 |
| 7UCR_A | 0.74 | 0.85 | 0.92 | 507.6  |
| 7UGA_A | 0.42 | 0.64 | 0.8  | 571.85 |
| 7UMC_A | 0.37 | 0.66 | 0.83 | 419.65 |
| 7UMD_A | 0.3  | 0.57 | 0.8  | 473.06 |
| 7UME_A | 0.33 | 0.66 | 0.88 | 425.17 |
| 7UQ6_B | 0.62 | 0.74 | 0.8  | 479.02 |
| 7UVT_A | 0.42 | 0.48 | 0.74 | 624.84 |
| 7UZ0_A | 0.73 | 0.77 | 0.88 | 486.44 |
| 7V06_A | 0.35 | 0.66 | 0.8  | 454.48 |
| 7V9E_A | 0.62 | 0.71 | 0.86 | 449.9  |
| 7VFT_A | 0.19 | 0.71 | 0.75 | 504.8  |
| 7WIA_V | 0.35 | 0.63 | 0.81 | 455.19 |
| 7XD3_N | 0.43 | 0.45 | 0.68 | 669.36 |
| 7XJZ_B | 0.78 | 0.73 | 0.83 | 446.84 |
| 7XK0_B | 0.81 | 0.74 | 0.82 | 440.24 |
| 7XSN_N | 0.44 | 0.48 | 0.75 | 631.33 |
| 7YC8_N | 0.42 | 0.46 | 0.7  | 738.82 |
| 7YGC_N | 0.41 | 0.46 | 0.69 | 762.75 |
| 8BGU_3 | 0.64 | 0.7  | 0.84 | 504.55 |
| 8D2A_A | 0.28 | 0.66 | 0.83 | 433.82 |
| 8DMB_W | 0.31 | 0.43 | 0.69 | 608.81 |
| 8DP3_R | 0.31 | 0.61 | 0.83 | 389.85 |
| 8E0F_D | 0.32 | 0.82 | 0.95 | 440.32 |
| 8EG0_C | 0.67 | 0.72 | 0.86 | 434.78 |
| 8F4O_B | 0.55 | 0.66 | 0.8  | 465.75 |
| 8FCS_A | 0.69 | 0.74 | 0.88 | 401.72 |
| 8GXC_A | 0.22 | 0.4  | 0.45 | 716.79 |
| 8HB8_A | 0.23 | 0.4  | 0.51 | 595.38 |
| 8HBA_A | 0.29 | 0.4  | 0.52 | 592.47 |
| 8HBA_B | 0.3  | 0.4  | 0.54 | 593.77 |
| 8HD6_N | 0.44 | 0.46 | 0.69 | 627.91 |
| 8I3Z_B | 0.15 | 0.34 | 0.55 | 703.11 |

|             |             |             |             |               |
|-------------|-------------|-------------|-------------|---------------|
| 8I43_A      | 0.11        | 0.66        | 0.72        | 461.93        |
| 8I7N_N      | 0.44        | 0.44        | 0.67        | 637.06        |
| R1107       | 0.37        | 0.5         | 0.68        | 566.14        |
| R1108       | 0.44        | 0.66        | 0.87        | 476.1         |
| R1116       | 0.53        | 0.62        | 0.8         | 444.77        |
| R1117       | 0.25        | 0.53        | 0.69        | 509.39        |
| R1126       | 0.07        | 0.32        | 0.03        | 41.83         |
| R1128       | 0.34        | 0.6         | 0.74        | 531.13        |
| R1136       | 0.07        | 0.29        | 0.04        | 139.17        |
| R1138       | 0.05        | 0.26        | 0.02        | 123.8         |
| R1149       | 0.33        | 0.57        | 0.84        | 532.1         |
| R1156       | 0.34        | 0.61        | 0.82        | 499.04        |
| R1189       | 0.19        | 0.5         | 0.63        | 509.37        |
| R1190       | 0.23        | 0.55        | 0.64        | 509.37        |
|             |             |             |             |               |
| <b>Mean</b> | <b>0.38</b> | <b>0.58</b> | <b>0.72</b> | <b>498.36</b> |

**Table S8:** Detailed scores for RNAComposer predictions (Predictions of 7QDU\_Q and R1138 are absent since there is a limitation of <500 nucleotides for this tool)

| <b>Targets</b> | <b>TM-score</b> | <b>IDDT</b> | <b>INF</b> | <b>Clash-score</b> |
|----------------|-----------------|-------------|------------|--------------------|
| 6YMC_A         | 0.38            | 0.82        | 0.92       | 23.95              |
| 7ECM_A         | 0.17            | 0.56        | 0.53       | 12.89              |
| 7EDL_A         | 0.18            | 0.58        | 0.44       | 13.55              |
| 7EDM_A         | 0.11            | 0.66        | 0.71       | 20.35              |
| 7EEM_A         | 0.28            | 0.55        | 0.7        | 20.62              |
| 7EFG_A         | 0.17            | 0.46        | 0.47       | 17.6               |
| 7EQJ_A         | 0.23            | 0.29        | 0.47       | 21.29              |
| 7EXY_A         | 0.15            | 0.51        | 0.76       | 7.91               |
| 7KUB_A         | 0.39            | 0.62        | 0.83       | 16.1               |
| 7KUC_A         | 0.33            | 0.69        | 0.83       | 15.3               |
| 7KUD_A         | 0.2             | 0.66        | 0.89       | 7.18               |
| 7KVT_B         | 0.22            | 0.33        | 0.43       | 20.6               |
| 7MLW_F         | 0.37            | 0.54        | 0.39       | 12.59              |
| 7Q48_A         | 0.12            | 0.21        | 0.49       | 16.76              |
| 7Q6L_A         | 0.03            | 0.22        | 0.4        | 19.47              |
| 7Q7X_B         | 0.09            | 0.67        | 0.79       | 18.21              |
| 7Q7X_C         | 0.21            | 0.52        | 0.62       | 11.6               |
| 7QA2_A         | 0.07            | 0.2         | 0.44       | 16.57              |
| 7QP2_A         | 0.25            | 0.57        | 0.61       | 20.62              |

|        |      |      |      |       |
|--------|------|------|------|-------|
| 7R6L_A | 0.14 | 0.35 | 0.4  | 18.05 |
| 7R6L_B | 0.1  | 0.5  | 0.53 | 27.14 |
| 7R6M_A | 0.21 | 0.35 | 0.47 | 68.71 |
| 7RQ5_A | 0.22 | 0.63 | 0.76 | 17.86 |
| 7RWR_A | 0.3  | 0.51 | 0.74 | 19.67 |
| 7SHX_A | 0.2  | 0.5  | 0.66 | 18.74 |
| 7UCR_A | 0.26 | 0.56 | 0.72 | 20.62 |
| 7UGA_A | 0.32 | 0.53 | 0.71 | 15.21 |
| 7UMC_A | 0.22 | 0.61 | 0.85 | 15.53 |
| 7UMD_A | 0.23 | 0.61 | 0.81 | 18.59 |
| 7UME_A | 0.29 | 0.65 | 0.88 | 17.72 |
| 7UQ6_B | 0.2  | 0.5  | 0.3  | 20.58 |
| 7UVT_A | 0.2  | 0.42 | 0.38 | 57.23 |
| 7UZ0_A | 0.2  | 0.44 | 0.32 | 22.44 |
| 7V06_A | 0.29 | 0.6  | 0.78 | 18.99 |
| 7V9E_A | 0.25 | 0.54 | 0.72 | 18.29 |
| 7VFT_A | 0.17 | 0.67 | 0.62 | 14.71 |
| 7WIA_V | 0.43 | 0.72 | 0.51 | 17.36 |
| 7XD3_N | 0.23 | 0.42 | 0.63 | 58.66 |
| 7XJZ_B | 0.23 | 0.47 | 0.32 | 24.46 |
| 7XK0_B | 0.24 | 0.47 | 0.31 | 24.46 |
| 7XSN_N | 0.18 | 0.42 | 0.7  | 20.13 |
| 7YC8_N | 0.14 | 0.4  | 0.38 | 18.05 |
| 7YGC_N | 0.14 | 0.41 | 0.69 | 18.05 |
| 8BGU_3 | 0.52 | 0.6  | 0.79 | 12.63 |
| 8D2A_A | 0.27 | 0.62 | 0.74 | 15.01 |
| 8DMB_W | 0.13 | 0.33 | 0.42 | 20.34 |
| 8DP3_R | 0.28 | 0.59 | 0.87 | 21.91 |
| 8E0F_D | 0.14 | 0.57 | 0.5  | 12.67 |
| 8EG0_C | 0.21 | 0.48 | 0.47 | 23.84 |
| 8F4O_B | 0.17 | 0.32 | 0.39 | 14.98 |
| 8FCS_A | 0.51 | 0.73 | 0.85 | 17.11 |
| 8GXC_A | 0.12 | 0.22 | 0.47 | 20.9  |
| 8HB8_A | 0.18 | 0.26 | 0.48 | 15.15 |
| 8HBA_A | 0.15 | 0.27 | 0.33 | 16    |
| 8HBA_B | 0.16 | 0.26 | 0.39 | 16    |
| 8HD6_N | 0.21 | 0.43 | 0.65 | 34.44 |
| 8I3Z_B | 0.13 | 0.33 | 0.4  | 14.93 |
| 8I43_A | 0.16 | 0.6  | 0.68 | 21.45 |

|             |             |             |             |              |
|-------------|-------------|-------------|-------------|--------------|
| 8I7N_N      | 0.22        | 0.41        | 0.68        | 47.2         |
| R1107       | 0.22        | 0.36        | 0.6         | 19.47        |
| R1108       | 0.3         | 0.47        | 0.73        | 9.5          |
| R1116       | 0.43        | 0.65        | 0.34        | 15.3         |
| R1117       | 0.12        | 0.2         | 0.55        | 24.86        |
| R1126       | 0.18        | 0.5         | 0.79        | 157.12       |
| R1128       | 0.23        | 0.69        | 0.87        | 12.63        |
| R1136       | 0.2         | 0.49        | 0.77        | 52.37        |
| R1149       | 0.31        | 0.61        | 0.83        | 16.15        |
| R1156       | 0.18        | 0.44        | 0.67        | 27.26        |
| R1189       | 0.2         | 0.49        | 0.68        | 11.24        |
| R1190       | 0.24        | 0.54        | 0.69        | 11.24        |
|             |             |             |             |              |
| <b>Mean</b> | <b>0.22</b> | <b>0.49</b> | <b>0.61</b> | <b>22.66</b> |

**Table S9:** Names and corresponding families of each of the 60 targets curated from rcsb PDB.

| PDB ID | Chain | Name                                                                                                                                                               | Rfam Family         |
|--------|-------|--------------------------------------------------------------------------------------------------------------------------------------------------------------------|---------------------|
| 6YMC   | A     | 26-mer stem-loop RNA                                                                                                                                               | -                   |
| 7ECM   | A     | RNA duplex containing C-A base pair                                                                                                                                | -                   |
| 7EDL   | A     | Crystal structure of the bacterial ribosomal decoding site in complex with G418 and Hg(II)                                                                         | -                   |
| 7EDM   | A     | Crystal structure of the eukaryotic ribosomal decoding site in complex with G418 and Hg(II)                                                                        | -                   |
| 7EEM   | A     | RNA bulged-G motif                                                                                                                                                 | -                   |
| 7EFG   | A     | RNA kink-turn motif                                                                                                                                                | -                   |
| 7EQJ   | A     | crystal structure of E. coli Valine tRNA                                                                                                                           | tRNA (RF00005 )     |
| 7EXY   | A     | T-hairpin structure found in the RNA element involved in the piRNA biogenesis                                                                                      | -                   |
| 7KUB   | A     | Au1 Domain of VEGF Readthrough Element                                                                                                                             | -                   |
| 7KUC   | A     | Ax1 Domain of VEGF Readthrough Element                                                                                                                             | -                   |
| 7KUD   | A     | Ax2 Domain of VEGF Readthrough Element                                                                                                                             | -                   |
| 7KVT   | B     | Crystal structure of Squash RNA aptamer in complex with DFHBI-1T with iridium (III) ions                                                                           | -                   |
| 7MLW   | F     | Burkholderia sp. TJI49 Guanidine-I riboswitch                                                                                                                      | ykkC-yxkD (RF00442) |
| 7Q48   | A     | Solution structure of an intramolecular RNA G-quadruplex formed by the 6A8U17U mutant from a 22mer guanine-rich sequence within the 5'UTR of BCL-2 proto onco-gene | -                   |
| 7Q6L   | A     | Solution structure of an intramolecular RNA G-quadruplex formed by the 6A8A17U mutant from a 22mer guanine-rich sequence within the 5'UTR of BCL-2 proto-oncogene  | -                   |
| 7Q7X   | B     | Crystal structure of the methyltransferase-ribozyme 1 (with 1-methyl-adenosine)                                                                                    | -                   |



|      |   |                                                                                                                                                                                  |                      |
|------|---|----------------------------------------------------------------------------------------------------------------------------------------------------------------------------------|----------------------|
| 7Q7X | C | Crystal structure of the methyltransferase-ribozyme 1 (with 1-methyl-adenosine)                                                                                                  | -                    |
| 7QA2 | A | Solution structure of an intramolecular RNA G-quadruplex formed by the 6A mutant from a 22mer guanine-rich sequence within the 5'UTR of BCL-2 proto-oncogene                     | -                    |
| 7QDU | Q | Twist-corrected RNA origami 5-helix Tile A                                                                                                                                       | -                    |
| 7QP2 | A | 1-deazaguanosine modified-RNA Sarcin Ricin Loop                                                                                                                                  | -                    |
| 7R6L | A | 5 prime exon-free pre-2S intermediate of the Tetrahymena group I intron, symmetry-expanded monomer from a synthetic dimeric construct, chain A                                   | -                    |
| 7R6L | B | 5 prime exon-free pre-2S intermediate of the Tetrahymena group I intron, symmetry-expanded monomer from a synthetic dimeric construct, chain B                                   | -                    |
| 7R6M | A | Post-2S intermediate of the Tetrahymena group I intron, symmetry-expanded monomer from a synthetic dimeric construct                                                             | -                    |
| 7RQ5 | A | Hairpin near 3'-Splice Site of Influenza A Segment 7 Bound to 5-nt Oligonucleotide                                                                                               | -                    |
| 7RWR | A | An RNA aptamer that decreases flavin redox potential                                                                                                                             | -                    |
| 7SHX | A | A functional SNP regulates E-cadherin expression by dynamically remodeling the 3D structure of a promoter-associated non-coding RNA transcript, NMR, minimized average structure | -                    |
| 7UCR | A | Joint X-ray/neutron structure of the Sarcin-Ricin loop RNA                                                                                                                       | -                    |
| 7UGA | A | Solution structure of NPSL2                                                                                                                                                      | -                    |
| 7UMC | A | DENV1 SLA RNA (DenvSLATL)                                                                                                                                                        | DENV_SLA (RF02340)   |
| 7UMD | A | DENV1 SLA three-way junction RNA (DenvSLAsh)                                                                                                                                     | -                    |
| 7UME | A | DENV1 SLA top stemloop RNA (DenvTSL)                                                                                                                                             | -                    |
| 7UQ6 | B | tRNA T-box antiterminator fusion, construct #4                                                                                                                                   | tRNA (RF00005 )      |
| 7UVT | A | Kinetically trapped misfolded state of the Tetrahymena ribozyme                                                                                                                  | Intron_gpl (RF00028) |
| 7UZ0 | A | AntiT-tRNA flip UCCA                                                                                                                                                             | tRNA (RF00005 )      |
| 7V06 | A | Encoded Conformational Dynamics of the HIV Splice Site A3 Regulatory Locus: Implications for differential binding of hnRNP Splicing Auxiliary Factors                            | -                    |
| 7V9E | A | Crystal structure of a methyl transferase ribozyme                                                                                                                               | -                    |
| 7VFT | A | Crystal structure of rGGGC(CAG)5GUCC oligo                                                                                                                                       | -                    |
| 7WIA | V | The apo-form of THF-II C22G riboswitch                                                                                                                                           | Intron_gpl (RF00028) |
| 7XD3 | N | The relaxed pre-Tet-S1 state of wild-type Tetrahymena group I intron with 6nt 3'/5'-exon                                                                                         | -                    |
| 7XJZ | B | Cryo-EM structure of Oryza sativa plastid glycyl-tRNA synthetase in complex with tRNA (tRNA binding state)                                                                       | tRNA (RF00005 )      |
| 7XK0 | B | Cryo-EM structure of Oryza sativa plastid glycyl-tRNA synthetase in complex with tRNA (tRNA locked state)                                                                        | tRNA (RF00005 )      |
| 7XSN | N | Native Tetrahymena ribozyme conformation                                                                                                                                         | Intron_gpl (RF00028) |
| 7YC8 | N | Cryo-EM structure of Tetrahymena ribozyme conformation 1 undergoing the first-step self-splicing                                                                                 | Intron_gpl (RF00028) |
| 7YGC | N | Cryo-EM structure of Tetrahymena ribozyme conformation 4 undergoing the second-step self-splicing                                                                                | -                    |

|      |   |                                                                                                                                  |                             |
|------|---|----------------------------------------------------------------------------------------------------------------------------------|-----------------------------|
| 8BGU | 3 | human MDM2-5S RNP                                                                                                                | 5S_rRNA (RF00001)           |
| 8D2A | A | Crystal structure of theophylline aptamer in complex with TAL3                                                                   | -                           |
| 8DMB | W | Structure of <i>Desulfovibrio thermocuniculi</i> IsrB (DtIsrB) in complex with omega RNA and target DNA                          | HEARO (RF02033)             |
| 8DP3 | R | Crystal structure of coxsackievirus B3 cloverleaf RNA replication element                                                        | Enterovirus_5_CRE (RF00386) |
| 8E0F | D | Human Adenosine Deaminase Acting on dsRNA (ADAR2-RD) bound to dsRNA containing a G-G pair adjacent to the target site            | -                           |
| 8EG0 | C | CryoEM structure of human METTL1-WDR4 in complex with Lys-tRNA and SAH                                                           | tRNA (RF00005)              |
| 8F4O | B | Apo structure of the TPP riboswitch aptamer domain                                                                               | TPP (RF00059)               |
| 8FCS | A | Structure of pre-miR-31 reveals an active role in Dicer processing                                                               | mir-31 (RF00661)            |
| 8GXC | A | Crystal structure of NAD <sup>+</sup> -II riboswitch in complex with NMN                                                         | -                           |
| 8HB8 | A | Crystal structure of NAD-II riboswitch (single strand) with NMN                                                                  | -                           |
| 8HBA | A | Crystal structure of NAD-II riboswitch (single strand) with NAD                                                                  | -                           |
| 8HBA | B | Crystal structure of NAD-II riboswitch (single strand) with NAD                                                                  | -                           |
| 8HD6 | N | The relaxed pre-Tet-S1 state of G264A mutated <i>Tetrahymena</i> group I intron with 6nt 3'/5'-exon and 2-aminopurine nucleoside | Intron_gpl (RF00028)        |
| 8I3Z | B | Crystal structure of NAD-II riboswitch (two strands) with NMN at 1.67 angstrom                                                   | -                           |
| 8I43 | A | Interaction between a fluoroquinolone derivative KG022 and RNAs: effect of base pairs 3' adjacent to the bulge out residues      | -                           |
| 8I7N | N | The Tet-S1 state of G264A mutated <i>Tetrahymena</i> group I intron with 6nt 3'/5'-exon and 2-aminopurine nucleoside             | Intron_gpl (RF00028)        |

**Table S10:** Names and corresponding families of each of the 12 CASP15 targets.

| CASP ID | PDB ID | Name                                                                                                  | Rfam Family                 |
|---------|--------|-------------------------------------------------------------------------------------------------------|-----------------------------|
| R1107   | 7QR4   | human CPEB3 HDV-like ribozyme                                                                         | CPEB3_ribozyme (RF00622)    |
| R1108   | 7QR3   | Chimpanzee CPEB3 HDV-like ribozyme                                                                    | CPEB3_ribozyme (RF00622)    |
| R1116   | 8S95   | Crystal Structure of Poliovirus (type 1 Mahoney) cloverleaf RNA with tRNA scaffold                    | Enterovirus_5_CRE (RF00386) |
| R1117   | 8FZA   | Class I type III preQ1 riboswitch from <i>E. coli</i>                                                 | -                           |
| R1126   | -      | Traptamer                                                                                             | -                           |
| R1128   | 8BTZA  | Single-stranded Paranemic Crossover RNA Triangle (PXT)                                                | -                           |
| R1136   | 7ZJ4   | Ligand bound state of a broccoli-pepper aptamer FRET tile                                             | -                           |
| R1138   | 7PTL   | Mature conformer of a 6-helix bundle of RNA with clasp                                                | -                           |
| R1149   | 8UYS   | SARS-CoV-2 5' proximal stem-loop 5                                                                    | -                           |
| R1156   | 8UYG   | BtCoV-HKU5 5' proximal stem-loop 5, conformation 2                                                    | -                           |
| R1189   | 7YR7   | Cryo-EM structure of <i>Pseudomonas aeruginosa</i> RsmZ RNA in complex with three RsmA protein dimers | PrrB_RsmZ (RF00166)         |

|       |      |                                                                                                     |                     |
|-------|------|-----------------------------------------------------------------------------------------------------|---------------------|
| R1190 | 7YR6 | Cryo-EM structure of <i>Pseudomonas aeruginosa</i> RsmZ RNA in complex with two RsmA protein dimers | PrrB_RsmZ (RF00166) |
|-------|------|-----------------------------------------------------------------------------------------------------|---------------------|

## References

1. Zhang, C., Shine, M., Pyle, A.M., and Zhang, Y. (2022). US-align: universal structure alignments of proteins, nucleic acids, and macromolecular complexes. *Nat Methods* 19, 1109–1115. 10.1038/s41592-022-01585-1.
2. Mariani, V., Biasini, M., Barbato, A., and Schwede, T. (2013). IDDT: a local superposition-free score for comparing protein structures and models using distance difference tests. *Bioinformatics* 29, 2722–2728. 10.1093/bioinformatics/btt473.
3. Biasini, M., Schmidt, T., Bienert, S., Mariani, V., Studer, G., Haas, J., Johner, N., Schenk, A.D., Philippsen, A., and Schwede, T. (2013). OpenStructure: an integrated software framework for computational structural biology. *Acta Cryst D* 69, 701–709. 10.1107/S0907444913007051.
4. Parisien, M., Cruz, J.A., Westhof, É., and Major, F. (2009). New metrics for comparing and assessing discrepancies between RNA 3D structures and models. *RNA* 15, 1875–1885. 10.1261/rna.1700409.
5. Das, R., Kretsch, R.C., Simpkin, A.J., Mulvaney, T., Pham, P., Rangan, R., Bu, F., Keegan, R.M., Topf, M., Rigden, D.J., et al. (2023). Assessment of three-dimensional RNA structure prediction in CASP15. Preprint at bioRxiv, 10.1101/2023.04.25.538330 10.1101/2023.04.25.538330.
6. Word, J.M., Lovell, S.C., LaBean, T.H., Taylor, H.C., Zalis, M.E., Presley, B.K., Richardson, J.S., and Richardson, D.C. (1999). Visualizing and quantifying molecular goodness-of-fit: small-probe contact dots with explicit hydrogen atoms<sup>11</sup>Edited by J. Thornton. *Journal of Molecular Biology* 285, 1711–1733. 10.1006/jmbi.1998.2400.
7. Chen, V.B., Arendall, W.B., Headd, J.J., Keedy, D.A., Immormino, R.M., Kapral, G.J., Murray, L.W., Richardson, J.S., and Richardson, D.C. (2010). MolProbity: all-atom structure validation for macromolecular crystallography. *Acta Cryst D* 66, 12–21. 10.1107/S0907444909042073.
